# Supplementary material for: Family Communication about Diagnostic Genetic Testing for Younger-Onset Dementia
Source: MDPI journal article supplement (doi:10.3390/jpm13040621), 2023-04-01
Supplement: s1 [file s1]

*Supplementary Table S1. Interview Guide*

| #   | Question                                                                                                                                                                                                 |
|-----|----------------------------------------------------------------------------------------------------------------------------------------------------------------------------------------------------------|
| 1.  | I understand you have a family member who was diagnosed with dementia while under the age of 65, which is considered to be a young age. Can you tell me a little bit about how this first came to light? |
| 2.  | Do you remember at what point you learnt that this dementia may be inherited?                                                                                                                            |
| 3.  | Some families are in better contact with each other than other families – what is it like in your family?                                                                                                |
| 4.  | When the diagnosis of dementia was first raised, did you have any conversations about it in your family?                                                                                                 |
| 5.  | What were these conversations like? Who was in them? Where did they take place?                                                                                                                          |
| 6.  | Is there anyone you chose not to speak to?                                                                                                                                                               |
| 7.  | I understand you attended an appointment at genetics at [Hospital name] with [name of relative with dementia]. What did you expect going into that appointment?                                          |
| 8.  | Can you tell me a little bit about what you remember happening at that appointment?                                                                                                                      |
| 9.  | What did you feel you took away from that appointment?                                                                                                                                                   |
| 10. | What did you understand about the genetic testing that was offered?                                                                                                                                      |
| 11. | How was the decision to undergo or not genetic testing reached?                                                                                                                                          |
| 12. | Did you think about genetic testing for yourself? What was that process like?                                                                                                                            |
| 13. | How long did you wait to get results of this testing? How did you cope with waiting?                                                                                                                     |
| 14. | I understand you attended a result appointment at [Hospital name] with [name of relative with dementia]. Can you tell me what you took away from that appointment?                                       |
| 15. | When you think back on the conversations you had over this period of time, is there anything you would have liked to have done differently?                                                              |
| 16. | Do you think there is a different way that genetics services could support you to have these conversations?                                                                                              |
| 17. | Is there anything we haven't spoken about that you think is important?                                                                                                                                   |
